# Supplementary material
Source: Springer Nature journal article supplement (http://www.springermedizin.de/resource/supplementary/13014_2013_1057_MOESM3_ESM.pdf/9635220)

**A**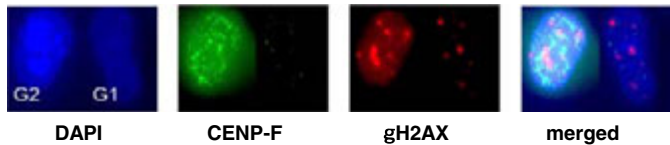**B**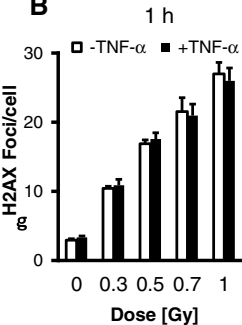**C**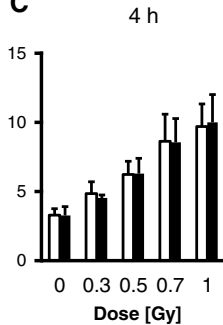**D**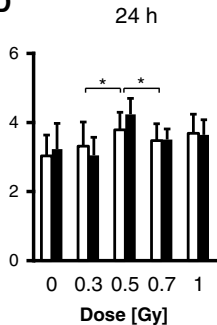

Supplement: MOESM3 [file 9635220]
